# Supplementary material for: Para una reforma de los delitos sexuales
Source: Royal Society of Chemistry journal article supplement (doi:10.1039/b806282j), 2008-01-01
Supplement: b806282j.pdf [file b806282j.pdf]

**Fluorescence Properties of The Dicationic Porphyrin 5,15-DiMPyP  
Orderly Aggregated Along DNA Surface**

**Supplementary Information**

Igor Sazanovich<sup>1,2,\*</sup>, Andrei Panarin<sup>2</sup>, Alexander Stupak<sup>2</sup>, Sergei Terekhov<sup>2</sup> and Vladimir Chirvony<sup>3</sup>

<sup>1</sup>Department of Chemistry, University of Sheffield, Brook Hill, Sheffield, S3 7HF, United Kingdom.

<sup>2</sup>B.I. Stepanov Institute of Physics, National Academy of Sciences of Belarus,  
Prosp. Nezavisimosti, 68, Minsk, 220072, Belarus.

<sup>3</sup>Technical University of Valencia, Nanophotonics Technology Center, 46022 Valencia, Spain.

\*Corresponding author email: [I.Sazanovich@sheffield.ac.uk](mailto:I.Sazanovich@sheffield.ac.uk) (Igor V. Sazanovich)

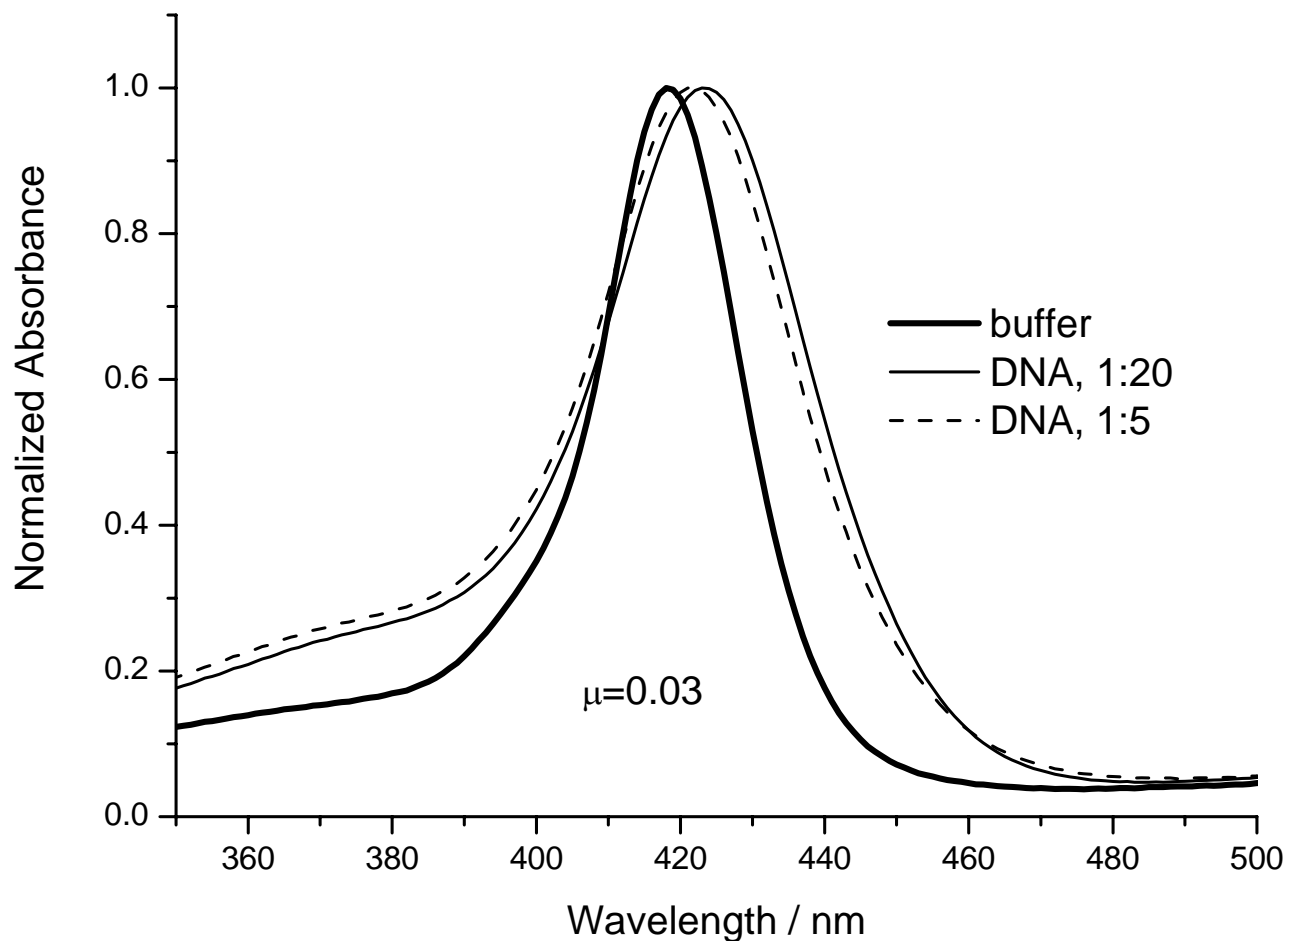

Figure 1 SI.

The Soret band absorption spectra of monomeric 5,15-DiMPyP, obtained at  $\mu=0.03$ , free in buffer solution (thick solid line) and complexed with DNA at  $r = 1:20$  (thin solid line) and at  $r = 1:5$  (dashed line).

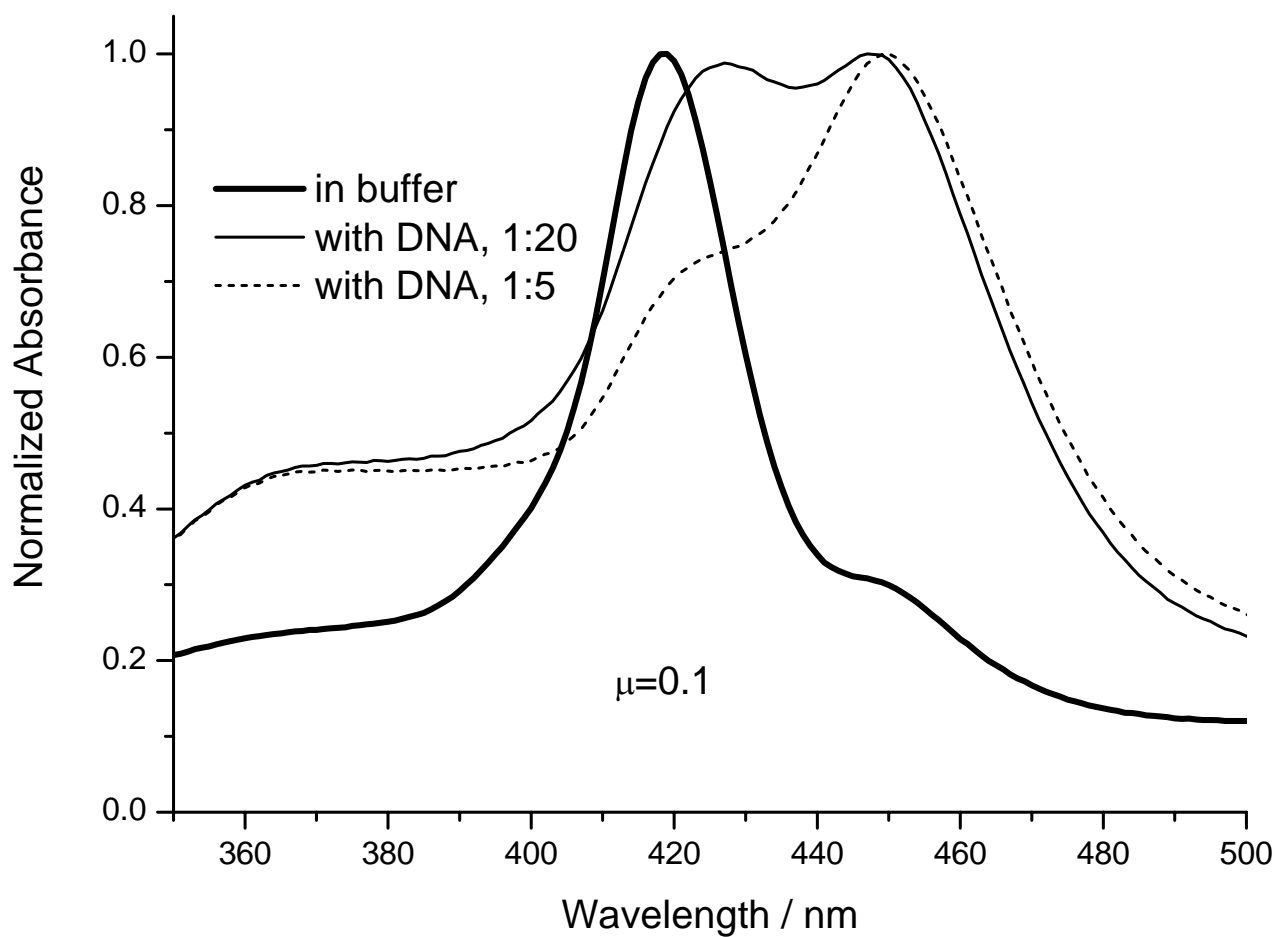

Figure 2 SI.

The Soret band absorption spectra of 5,15-DiMPyP, obtained at  $\mu=0.1$ , free in buffer solution (thick solid line) and in presence of DNA at  $r = 1:20$  (thin solid line) and at  $r = 1:5$  (dashed line).

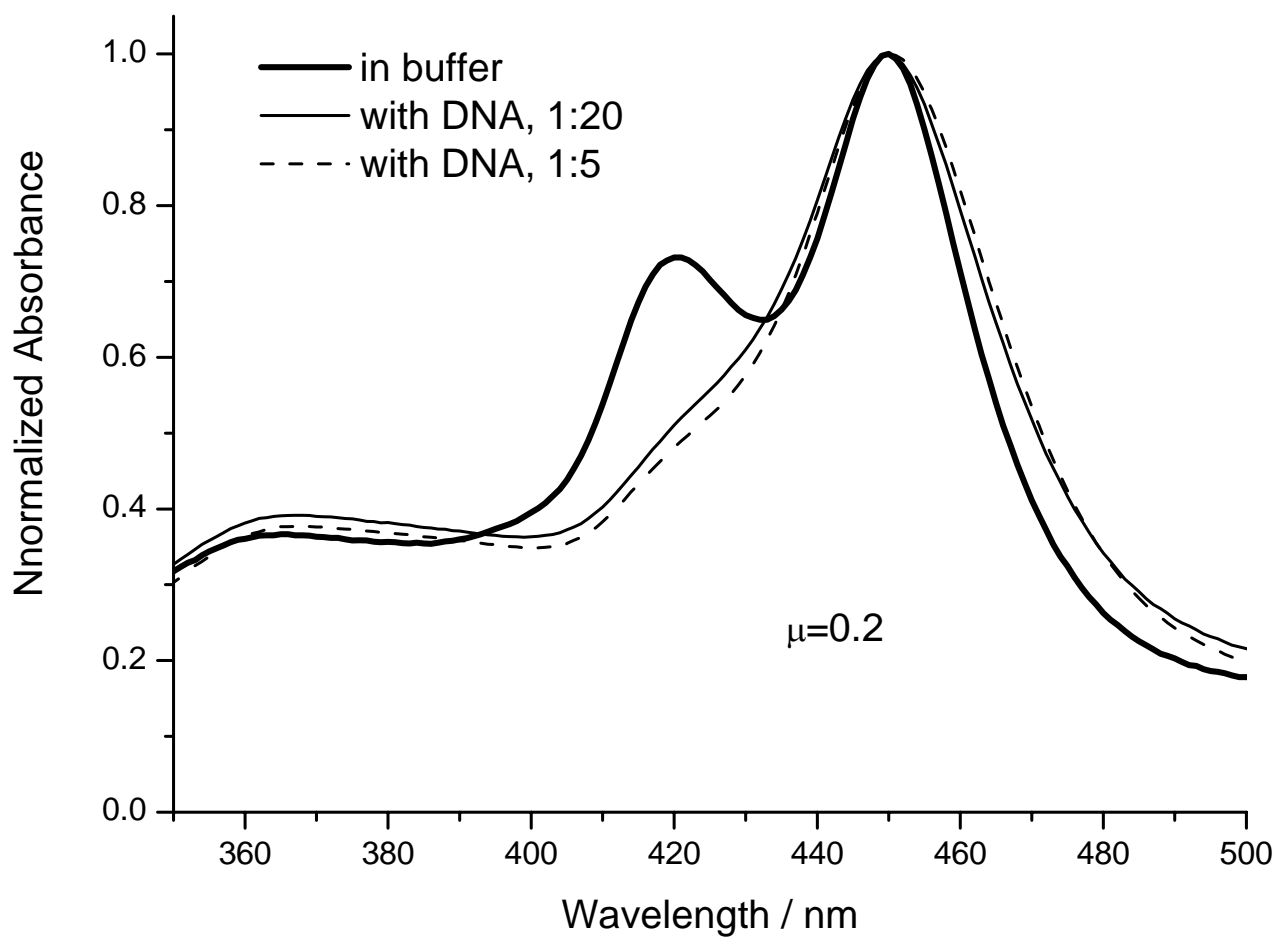

Figure 3 SI.

The Soret band absorption spectra of 5,15-DiMPyP, obtained at  $\mu=0.2$ , free in buffer solution (thick solid line) and in presence of DNA at  $r = 1:20$  (thin solid line) and at  $r = 1:5$  (dashed line).

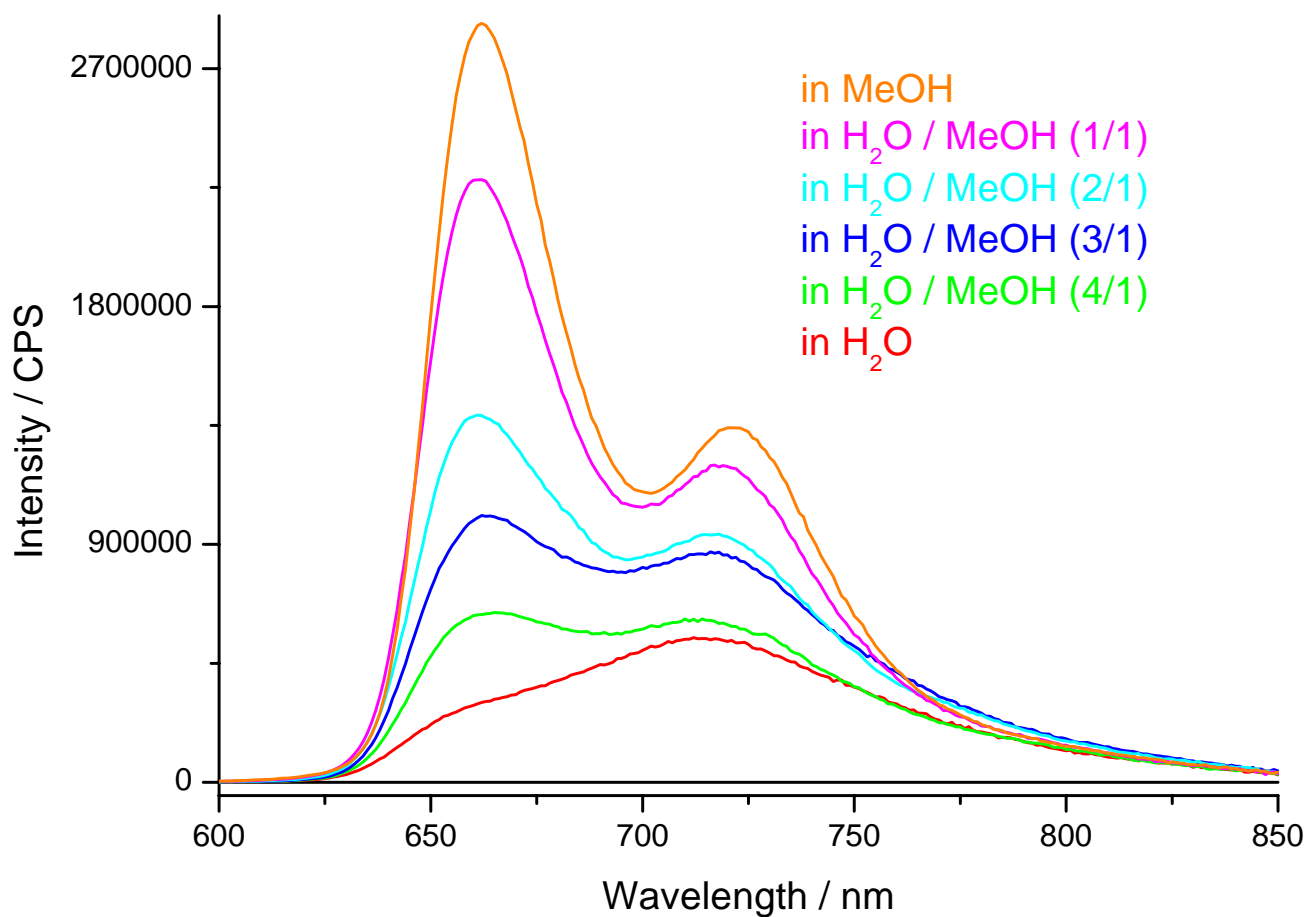

Figure 4 SI.

Steady-state fluorescence spectra of 5,15-DiMPyP in H<sub>2</sub>O, MeOH & H<sub>2</sub>O/MeOH mixtures (v/v). The data obtained under 420 nm excitation for optically matched samples, with optical density 0.1 at excitation wavelength in 1 cm pathlength.
